# Supplementary material for: Helicobacter pylori eradication rate of standard triple therapy and factors affecting eradication rate at Bahir Dar city administration, Northwest Ethiopia: A prospective follow up study
Source: PubMed Central journal article supplement (PMC6548423; doi:10.1371/journal.pone.0217645), 2019-06-04
Supplement: pone.0217645.s002.pdf [file pone.0217645.s002.pdf]

## S1 Table

**S1 Table:** Sociodemographic data

| Sr. No | Questions              | Response                                                                                                                                                                           |
|--------|------------------------|------------------------------------------------------------------------------------------------------------------------------------------------------------------------------------|
| 100    | Patient Card No: _____ | Code given _____                                                                                                                                                                   |
| 101    | Sex                    | <input type="checkbox"/> Male<br><input type="checkbox"/> Female                                                                                                                   |
| 102    | Age                    | _____ in years                                                                                                                                                                     |
| 103    | Weight                 | _____ Kg                                                                                                                                                                           |
| 104    | Height                 | _____ Meter                                                                                                                                                                        |
| 105    | Address                | Region _____<br>Zone _____<br>Woreda _____<br>Kebele _____<br>Phone No: _____                                                                                                      |
| 106    | Residence              | <input type="checkbox"/> Rural<br><input type="checkbox"/> Urban                                                                                                                   |
| 107    | Marital status         | <input type="checkbox"/> Single<br><input type="checkbox"/> Married<br><input type="checkbox"/> Divorced<br><input type="checkbox"/> Widowed<br><input type="checkbox"/> Separated |
| 108    | Religion               | <input type="checkbox"/> Orthodox<br><input type="checkbox"/> Protestant<br><input type="checkbox"/> Muslim<br><input type="checkbox"/> others, specify _____                      |

|     |                               |                                                                                                                                                                                                                                                                                              |
|-----|-------------------------------|----------------------------------------------------------------------------------------------------------------------------------------------------------------------------------------------------------------------------------------------------------------------------------------------|
| 109 | What is your occupation?      | <input type="checkbox"/> House wife<br><input type="checkbox"/> Gov't Employee<br><input type="checkbox"/> Private Employee<br><input type="checkbox"/> Merchant<br><input type="checkbox"/> Daily laborer<br><input type="checkbox"/> 7. Others, specify _____                              |
| 110 | Your educational status is?   | <input type="checkbox"/> Unable to read and write<br><input type="checkbox"/> Read and write<br><input type="checkbox"/> Primary education(1-8 <sup>th</sup> grade)<br><input type="checkbox"/> Secondary education (9-12 <sup>th</sup> grade)<br><input type="checkbox"/> College and above |
| 111 | Ethnicity                     | <input type="checkbox"/> Amhara<br><input type="checkbox"/> Tigrie<br><input type="checkbox"/> Agew<br><input type="checkbox"/> Oromo<br><input type="checkbox"/> Guragie<br><input type="checkbox"/> Others                                                                                 |
| 112 | Average monthly family income | in birr _____                                                                                                                                                                                                                                                                                |
