# Supplementary material for: Helicobacter pylori eradication rate of standard triple therapy and factors affecting eradication rate at Bahir Dar city administration, Northwest Ethiopia: A prospective follow up study
Source: PubMed Central journal article supplement (PMC6548423; doi:10.1371/journal.pone.0217645), 2019-06-04
Supplement: pone.0217645.s003.pdf [file pone.0217645.s003.pdf]

## S2 table

**S2 Table:** Response of *H. pylori* positive patients on first encounter

| Sr. No | Questions                                                                                         | Possible responses                                                                                                                                                                                                                                                                                                                                                  |
|--------|---------------------------------------------------------------------------------------------------|---------------------------------------------------------------------------------------------------------------------------------------------------------------------------------------------------------------------------------------------------------------------------------------------------------------------------------------------------------------------|
| 201    | Have you ever diagnosed with H pylori infection before this?                                      | <input type="checkbox"/> Yes (old)<br><input type="checkbox"/> No (New)                                                                                                                                                                                                                                                                                             |
| 202    | Have you taken triple therapy previously                                                          | <input type="checkbox"/> Yes<br><input type="checkbox"/> No                                                                                                                                                                                                                                                                                                         |
| 203    | When your current health problem started?                                                         | <input type="checkbox"/> Since this week<br><input type="checkbox"/> Since last two weeks<br><input type="checkbox"/> Since a month<br><input type="checkbox"/> Since three months<br><input type="checkbox"/> Since six months<br><input type="checkbox"/> Since a year<br><input type="checkbox"/> Since two years<br><input type="checkbox"/> Before three years |
| 204    | Have you taken medications in the last two weeks?                                                 | <input type="checkbox"/> Yes (can you list _____)<br><input type="checkbox"/> No                                                                                                                                                                                                                                                                                    |
| 205    | When you feel discomfort/pain                                                                     | <input type="checkbox"/> After meal<br><input type="checkbox"/> Before meal<br><input type="checkbox"/> Persistently or Always<br><input type="checkbox"/> At night                                                                                                                                                                                                 |
| 206    | Which alcoholic drink(s) you had taken before you came for medical care? (more than one response) | <input type="checkbox"/> Traditional alcoholic drinks (Tella, Arekie, Teji)<br><input type="checkbox"/> Bears<br><input type="checkbox"/> Woin<br><input type="checkbox"/> Wuski<br><input type="checkbox"/> Others, specify _____                                                                                                                                  |
| 207    | Do you have history of other chronic illnesses? (more than one response is possible)              | <input type="checkbox"/> Liver disease<br><input type="checkbox"/> Kidney disease<br><input type="checkbox"/> Diabetes<br><input type="checkbox"/> Hypertension                                                                                                                                                                                                     |

|     |                                                                                                  |                                                                       |
|-----|--------------------------------------------------------------------------------------------------|-----------------------------------------------------------------------|
|     |                                                                                                  | <input type="checkbox"/> Asthma<br><input type="checkbox"/> Oher_____ |
| 208 | Do you smoke?                                                                                    | <input type="checkbox"/> Yes<br><input type="checkbox"/> No           |
| 209 | What traditional homemade remedies you took for the illness before you came here                 | _____<br>_____<br>_____                                               |
| 210 | What modern medication other than the three drugs you took for the illness before you came here? | _____<br>_____<br>_____                                               |
