# Supplementary material for: Helicobacter pylori eradication rate of standard triple therapy and factors affecting eradication rate at Bahir Dar city administration, Northwest Ethiopia: A prospective follow up study
Source: PubMed Central journal article supplement (PMC6548423; doi:10.1371/journal.pone.0217645), 2019-06-04
Supplement: pone.0217645.s004.pdf [file pone.0217645.s004.pdf]

### S3 Table

**S3 Table:** Response of *H. pylori* positive patients on second first encounter

| Sr. No | Questions                                                           | Possible responses                                                                                                                                                             |
|--------|---------------------------------------------------------------------|--------------------------------------------------------------------------------------------------------------------------------------------------------------------------------|
| 300    | Can you give me your appointment card?                              | Card No: _____                                                                                                                                                                 |
| 301    | Could you stand on the balance here?                                | Patient weight: _____                                                                                                                                                          |
| 302    | How much confident are you on your medication administration        | <input type="checkbox"/> Surely complete (100)%<br><input type="checkbox"/> Mostly (80%)<br><input type="checkbox"/> Partially<br><input type="checkbox"/> Somewhat impossible |
| 303    | What are the major adverse drug effect you encounter during therapy | _____<br>_____<br>_____<br>_____                                                                                                                                               |
| 304    | Have you used homemade remedies during therapy                      | <input type="checkbox"/> Yes (If yes what? _____)<br><input type="checkbox"/> No                                                                                               |
| 305    | What you are currently feeling on your previous health problem      | <input type="checkbox"/> I am feeling nothing<br><input type="checkbox"/> Improved but still feeling<br><input type="checkbox"/> Not improved at all                           |
