# Supplementary material for: Helicobacter pylori eradication rate of standard triple therapy and factors affecting eradication rate at Bahir Dar city administration, Northwest Ethiopia: A prospective follow up study
Source: PLoS One. 2019 Jun 4;14(6):e0217645. doi: 10.1371/journal.pone.0217645 (PMC6548423; doi:10.1371/journal.pone.0217645)
Supplement: S4 Table — (PDF) [file pone.0217645.s005.pdf]

S4 Table

**S4 Table:** Format for laboratory result of patients on H. pylori eradication therapy research

[illegible]
